# Supplementary material for: Human Dietary Exposure to Heavy Metals via Rice in Nepal
Source: MDPI journal article supplement (doi:10.3390/ijerph20054134), 2023-02-25
Supplement: s1 [file s1]

# Human Dietary Exposure to Heavy Metals Via Rice in Nepal

Yuxiao Shao <sup>1,2</sup>, Xiaohang Xu <sup>2,3</sup>, Le Wang <sup>2</sup>, Jialiang Han <sup>2,4</sup>, Hem Bahadur Katuwal <sup>5</sup>, Shulin Jiao <sup>1,\*</sup> and Guangle Qiu <sup>2</sup>

<sup>1</sup> School of Geography and Environmental Science, Guizhou Normal University, Guiyang 550025, China; shaoyuxiao29@163.com

<sup>2</sup> State Key Laboratory of Environmental Geochemistry, Institute of Geochemistry, Chinese Academy of Sciences, Guiyang 550081, China; xxh1119@foxmail.com (X.X.); wangle0602@foxmail.com (L.W.); hanjialiang@mail.gyig.ac.cn (J.H.); qiuguangle@vip.skleg.cn (G.Q.)

<sup>3</sup> Key Laboratory of Karst Georesources and Environment, Ministry of Education, College of Resources and Environmental Engineering, Guizhou University, Guiyang 550025, China

<sup>4</sup> University of Chinese Academy of Sciences, Beijing 100049, China

<sup>5</sup> Center for Integrative Conservation, Xishuangbanna Tropical Botanical Garden, Chinese Academy of Sciences, Mengla 666303, China; hembdrkatuwal@gmail.com

\* Correspondence: jiaoshulin@gznu.edu.cn

## Table of Contents

**Table S1.** Parameters used in exposure risk assessment in this study.

**Table S2.** Body weight, intake rate, and age for calculating EDI in Nepal.

**Table S3.** Concentrations of Cd, As, Pb, and Cu in market rice reported from other countries.

**Table S4.** Heavy metals exposure ( $\mu\text{g/kg bw/day}$ ) via rice consumption and corresponding HQs, HI.

**Table S5.** Carcinogenic risk (CR) and total carcinogenic risk (TCR) based on Monte Carlo simulation.

**Figure S1.** Probability distribution of hazard quotients (HQs) of As (a), Cd (b), Pb (c), and Cu (d) in different regions, and probability distribution of hazard quotients (HQs) of As (e), Cd (f), Pb (g), and Cu (h) for various vulnerable populations.

**Figure S2.** Probability distributions for Carcinogenic risk (CR) of As (a), Cd (b), and Pb (c) in different regions, and probability distributions for Carcinogenic risk (CR) of As (d), Cd (e), and Pb (f) for various vulnerable populations.

**Table S1.** Parameters used in exposure risk assessment in this study.

| Parameter | Description                        | Values                                               | Unit             | Reference  |
|-----------|------------------------------------|------------------------------------------------------|------------------|------------|
| CF        | Concentration of the metal in rice |                                                      | $\mu\text{g/kg}$ | This study |
| EF        | Exposure Frequency                 | 365                                                  | day/year         | [1]        |
| IR        | Rice Intake Rate                   |                                                      | g/day            | [2]        |
| ED        | Exposure Duration                  | 70                                                   | years            | [1]        |
| BW        | Body weight                        |                                                      | kg               | [3]        |
| AT        | Average exposure time              | 365× ED (non-carcinogenic)<br>365× 70 (carcinogenic) | day              | [4]        |

**Table S2.** Body weight, intake rate, and age for calculating EDI in Nepal.

| Category      | Body weight (kg) | Intake rate (g/day) | Age          |
|---------------|------------------|---------------------|--------------|
| Province 1    | 60               | 308.3               | Adult        |
| Madhesh       | 60               | 345.7               | Adult        |
| Bagmati       | 60               | 280.3               | Adult        |
| Gandaki       | 60               | 320.0               | Adult        |
| Lumbini       | 60               | 339.2               | Adult        |
| Karnail       | 60               | 291.5               | Adult        |
| Sudurpashchim | 60               | 259.8               | Adult        |
| Terai         | 60               | 341.5               | Adult        |
| Hill          | 60               | 275.6               | Adult        |
| Mountain      | 60               | 315.8               | Adult        |
| Urban         | 60               | 304.5               | Adult        |
| Rural         | 60               | 316.2               | Adult        |
| Women         | 50               | 322.4               | 15-49 years  |
| Children      | 32               | 260.6               | 5-12 years   |
| Toddlers      | 8.63             | 86.0                | 13-24 months |
| Preschooler   | 12               | 176.0               | 37-50 months |
| Total Nepal   | 60               | 313.0               | Adult        |

**Table S3.** Concentrations of Cd, As, Pb, and Cu in market rice reported from other countries.

| Rice origin     | Sam-<br>pling/<br>purchas-<br>ing site | Sample size | Cd<br>(µg/kg)  | Range<br>(µg/kg) | As<br>(µg/kg)  | Range<br>(µg/kg) | Pb<br>(µg/kg)  | Range<br>(µg/kg) | Cu (µg/kg)    | Range<br>(µg/kg)  | Refer-<br>ence |
|-----------------|----------------------------------------|-------------|----------------|------------------|----------------|------------------|----------------|------------------|---------------|-------------------|----------------|
| Nepal           | 7 prov-<br>inces                       | 170         | 15.3 ±<br>16.1 | 9.00-95.4        | 43.4±19.6      | 6.4-120.8        | 16± 14         | 5.5-121.4        | 1065.5±1210.3 | 236.6-<br>10058.5 | This<br>study  |
| Nepal           | Nepal                                  | 12          | 50             | 13.9-80          | No             | No               | No             | No               | No            | No                | [5]            |
| Nepal           | Nepal                                  | 12          | No             | No               | No             | No               | 33.0±26.0      | 3.0-71           | No            | No                | [6]            |
| Sri Lanka       | Sri Lanka                              | 165         | 80±130         | 3-727            | 77±40          | 19-217           | 31±50          | 1.0-345          | No            | No                | [7]            |
| Sri Lanka       | Sri Lanka                              | 226         | 85             | No               | 43             | 2.50-213         | No             | No               | No            | No                | [8]            |
| Sri Lanka       | Sri Lanka                              | 41          | No             | No               | No             | No               | 20±1.5         | 3.0-61.0         | No            | No                | [6]            |
| Ghana           | Ghana                                  | 428         | 20             | 5.00-270         | No             | No               | No             | No               | No            | No                | [5]            |
| Malay-<br>sia   | Malaysia                               | 66          | 95             | No               | 91             | No               | 110            | No               | 2400          | No                | [9]            |
| India           | India                                  | 64          | No             | No               | No             | No               | 23.0 ±<br>40.0 | 3.0-266          | No            | No                | [6]            |
| Iran            | Yazd,<br>Iran                          | 108         | 37.3 ±<br>23.4 | No               | 33.5 ±<br>18.4 | No               | 328 ± 44.8     | 132 -463         | No            | No                | [10]           |
| Spain           | Spain                                  | 89          | No             | No               | No             | No               | 15.0 ±<br>11.0 | 3.0-89.0         | No            | No                | [6]            |
| China           | 20 prov-<br>inces                      | 712         | 50             | ND-740           | 119            | ND-490           | 62             | ND-400           | No            | No                | [1]            |
| Brazil          | Brazil                                 | 23          | No             | No               | No             | No               | 5.30 ±<br>4.10 | 0.4-14.5         | No            | No                | [11]           |
| China           | 22 prov-<br>inces                      | 92          | 80.0 ±<br>70.0 | ND-373           | 50.0 ±<br>10.0 | ND-310           | 100-140        | ND-524           | No            | No                | [12]           |
| Korea           | Korea                                  | 63          | 21             | 10-32            | 122            | 43-199           | No             | No               | 1850          | 1290-2530         | [13]           |
| Bangla-<br>desh | Bangla-<br>desh                        | 6           | 73             | 69-77            | No             | No               | 19             | 5-28             | 1600          | 1300-1900         | [14]           |
| Paki-<br>stan   | Pakistan                               | 9           | 4.5            | ND-8.9           | No             | No               | 67             | 3-168            | 2600          | 1900-3600         | [14]           |
| Thai-<br>land   | Thailand                               | 12          | 13             | 6.3-17.8         | No             | No               | 419            | 96-921           | 3500          | 2000-6800         | [14]           |
| India           | India                                  | 15          | 19.1           | ND-36.4          | No             | No               | 267            | 2-637            | 5900          | 2300-11800        | [14]           |
| Aus-<br>tralia  | Australia                              | 21          | 7.5            | 8.7-17.1         | No             | No               | 375            | 16-1248          | 2900          | 1000-9400         | [14]           |
| Italy           | Italy                                  | 6           | 0.5            | 0.2-0.8          | No             | No               | 317            | 44-841           | 5800          | 1300-13000        | [14]           |
| Vi-<br>etnam    | Vietnam                                | 3           | No             | No               | No             | No               | No             | No               | 9300          | 7900-10700        | [5]            |
| Iran            | Iran                                   | 36          | 33.7 ± 39      | 1-222            | 369± 94        | 91-872           | 123 ±140       | 5-574            | 3095±439420   | 1690-4590         | [15]           |
| India           | India                                  | 17          | No             | No               | No             | No               | No             | No               | 5900          | 2300-11800        | [5]            |

**Table S4.** Heavy metals exposure ( $\mu\text{g/kg bw/day}$ ) via rice consumption and corresponding HQs, HI.

| Element | Categories    | Mean $\pm$ Std      | Min     | Max   | P50    | P75    | P90    | P95   | P97.5 | P99   | P99.9 |
|---------|---------------|---------------------|---------|-------|--------|--------|--------|-------|-------|-------|-------|
| Cd      | Province 1    | 0.127 $\pm$ 0.161   | 0.00904 | 0.490 | 0.0789 | 0.152  | 0.276  | 0.379 | 0.511 | 0.760 | 1.78  |
|         | Madhesh       | 0.127 $\pm$ 0.113   | 0.0392  | 0.267 | 0.0930 | 0.150  | 0.241  | 0.326 | 0.427 | 0.565 | 1.07  |
|         | Bagmati       | 0.0841 $\pm$ 0.0540 | 0.0125  | 0.261 | 0.0723 | 0.107  | 0.151  | 0.183 | 0.219 | 0.270 | 0.418 |
|         | Lumbini       | 0.124 $\pm$ 0.0830  | 0.00977 | 0.388 | 0.107  | 0.170  | 0.241  | 0.287 | 0.330 | 0.371 | 0.457 |
|         | Sudurpashchim | 0.0889 $\pm$ 0.0523 | 0.0184  | 0.225 | 0.0808 | 0.116  | 0.155  | 0.184 | 0.213 | 0.256 | 0.349 |
|         | Terai         | 0.119 $\pm$ 0.0970  | 0.00746 | 0.543 | 0.0925 | 0.152  | 0.235  | 0.301 | 0.371 | 0.488 | 0.773 |
|         | Hill          | 0.0958 $\pm$ 0.0783 | 0.00602 | 0.438 | 0.0746 | 0.123  | 0.189  | 0.243 | 0.299 | 0.394 | 0.623 |
|         | Mountain      | 0.110 $\pm$ 0.0897  | 0.00690 | 0.502 | 0.0855 | 0.141  | 0.217  | 0.278 | 0.343 | 0.451 | 0.714 |
|         | Urban         | 0.106 $\pm$ 0.0865  | 0.00665 | 0.484 | 0.0824 | 0.135  | 0.209  | 0.268 | 0.331 | 0.435 | 0.689 |
|         | Rural         | 0.110 $\pm$ 0.0898  | 0.00691 | 0.503 | 0.0856 | 0.141  | 0.217  | 0.278 | 0.343 | 0.452 | 0.715 |
|         | Women         | 0.134 $\pm$ 0.110   | 0.00845 | 0.615 | 0.105  | 0.172  | 0.266  | 0.341 | 0.420 | 0.553 | 0.875 |
|         | Children      | 0.170 $\pm$ 0.139   | 0.0107  | 0.777 | 0.132  | 0.217  | 0.335  | 0.430 | 0.530 | 0.698 | 1.11  |
|         | Toddlers      | 0.208 $\pm$ 0.170   | 0.0131  | 0.950 | 0.162  | 0.266  | 0.411  | 0.527 | 0.649 | 0.854 | 1.35  |
|         | Preschooler   | 0.306 $\pm$ 0.250   | 0.0192  | 1.399 | 0.238  | 0.392  | 0.604  | 0.775 | 0.955 | 1.26  | 1.99  |
|         | Total Nepal   | 0.108 $\pm$ 0.0888  | 0.00684 | 0.498 | 0.0846 | 0.138  | 0.212  | 0.274 | 0.345 | 0.440 | 0.719 |
|         | HQ            | 0.108 $\pm$ 0.0888  | 0.00684 | 0.498 | 0.0846 | 0.138  | 0.212  | 0.274 | 0.345 | 0.440 | 0.719 |
|         | Province 1    | 0.211 $\pm$ 0.095   | 0.0330  | 0.474 | 0.211  | 0.269  | 0.325  | 0.364 | 0.402 | 0.453 | 0.600 |
|         | Madhesh       | 0.313 $\pm$ 0.169   | 0.0980  | 0.696 | 0.275  | 0.391  | 0.529  | 0.632 | 0.748 | 0.896 | 1.28  |
|         | Bagmati       | 0.227 $\pm$ 0.0670  | 0.118   | 0.382 | 0.223  | 0.277  | 0.321  | 0.345 | 0.362 | 0.377 | 0.395 |
|         | Lumbini       | 0.295 $\pm$ 0.101   | 0.131   | 0.485 | 0.291  | 0.374  | 0.435  | 0.464 | 0.483 | 0.498 | 0.513 |
| As      | Sudurpashchim | 0.163 $\pm$ 0.0582  | 0.0751  | 0.261 | 0.163  | 0.212  | 0.245  | 0.256 | 0.263 | 0.267 | 0.270 |
|         | Terai         | 0.274 $\pm$ 0.112   | 0.0366  | 0.688 | 0.264  | 0.341  | 0.418  | 0.476 | 0.532 | 0.587 | 0.730 |
|         | Hill          | 0.221 $\pm$ 0.0905  | 0.0295  | 0.555 | 0.213  | 0.275  | 0.338  | 0.384 | 0.429 | 0.474 | 0.589 |
|         | Mountain      | 0.253 $\pm$ 0.104   | 0.0338  | 0.636 | 0.244  | 0.315  | 0.387  | 0.440 | 0.492 | 0.543 | 0.675 |
|         | Urban         | 0.244 $\pm$ 0.100   | 0.0326  | 0.613 | 0.235  | 0.304  | 0.373  | 0.424 | 0.474 | 0.523 | 0.651 |
|         | Rural         | 0.253 $\pm$ 0.104   | 0.0339  | 0.637 | 0.244  | 0.316  | 0.387  | 0.440 | 0.493 | 0.543 | 0.676 |
|         | Women         | 0.310 $\pm$ 0.127   | 0.0414  | 0.779 | 0.299  | 0.386  | 0.474  | 0.539 | 0.603 | 0.665 | 0.827 |
|         | Children      | 0.392 $\pm$ 0.160   | 0.0523  | 0.98  | 0.378  | 0.488  | 0.598  | 0.681 | 0.761 | 0.840 | 1.04  |
|         | Toddlers      | 0.479 $\pm$ 0.196   | 0.0641  | 1.20  | 0.462  | 0.597  | 0.732  | 0.833 | 0.931 | 1.03  | 1.28  |
|         | Preschooler   | 0.705 $\pm$ 0.289   | 0.0943  | 1.77  | 0.680  | 0.879  | 1.078  | 1.23  | 1.37  | 1.51  | 1.88  |
|         | Total Nepal   | 0.250 $\pm$ 0.104   | 0.0335  | 0.630 | 0.239  | 0.313  | 0.388  | 0.436 | 0.484 | 0.543 | 0.671 |
|         | HQ            | 0.834 $\pm$ 0.346   | 0.112   | 2.10  | 0.795  | 1.04   | 1.29   | 1.45  | 1.61  | 1.81  | 2.24  |
|         | Province 1    | 0.0977 $\pm$ 0.0710 | 0.0282  | 0.624 | 0.077  | 0.118  | 0.180  | 0.230 | 0.291 | 0.364 | 0.631 |
|         | Madhesh       | 0.117 $\pm$ 0.0693  | 0.0330  | 0.213 | 0.100  | 0.145  | 0.205  | 0.249 | 0.295 | 0.352 | 0.534 |
|         | Bagmati       | 0.0732 $\pm$ 0.0479 | 0.0276  | 0.201 | 0.0602 | 0.0860 | 0.124  | 0.158 | 0.197 | 0.248 | 0.451 |
|         | Lumbini       | 0.116 $\pm$ 0.0551  | 0.0340  | 0.290 | 0.104  | 0.141  | 0.187  | 0.221 | 0.253 | 0.298 | 0.404 |
|         | Sudurpashchim | 0.0680 $\pm$ 0.0925 | 0.0346  | 0.116 | 0.0476 | 0.0677 | 0.109  | 0.157 | 0.226 | 0.336 | 1.03  |
|         | Terai         | 0.108 $\pm$ 0.0769  | 0.0313  | 0.691 | 0.0867 | 0.130  | 0.193  | 0.247 | 0.306 | 0.407 | 0.755 |
|         | Hill          | 0.0875 $\pm$ 0.0621 | 0.0252  | 0.558 | 0.0700 | 0.105  | 0.156  | 0.200 | 0.247 | 0.329 | 0.610 |
|         | Mountain      | 0.100 $\pm$ 0.0712  | 0.0289  | 0.639 | 0.0802 | 0.121  | 0.179  | 0.229 | 0.283 | 0.377 | 0.699 |
| Pb      | Urban         | 0.0967 $\pm$ 0.0686 | 0.0279  | 0.616 | 0.0773 | 0.116  | 0.172  | 0.220 | 0.273 | 0.363 | 0.673 |
|         | Rural         | 0.100 $\pm$ 0.0712  | 0.0289  | 0.64  | 0.0803 | 0.121  | 0.179  | 0.229 | 0.284 | 0.377 | 0.699 |
|         | Women         | 0.123 $\pm$ 0.0871  | 0.0354  | 0.783 | 0.0982 | 0.148  | 0.219  | 0.280 | 0.347 | 0.461 | 0.856 |
|         | Children      | 0.155 $\pm$ 0.110   | 0.0447  | 0.989 | 0.124  | 0.187  | 0.277  | 0.354 | 0.438 | 0.582 | 1.08  |
|         | Toddlers      | 0.190 $\pm$ 0.135   | 0.0547  | 1.21  | 0.152  | 0.228  | 0.338  | 0.433 | 0.537 | 0.713 | 1.32  |
|         | Preschooler   | 0.279 $\pm$ 0.198   | 0.0806  | 1.78  | 0.223  | 0.336  | 0.498  | 0.637 | 0.790 | 1.05  | 1.95  |
|         | Total Nepal   | 0.100 $\pm$ 0.0720  | 0.0287  | 0.633 | 0.0799 | 0.120  | 0.179  | 0.231 | 0.292 | 0.382 | 0.656 |
|         | HQ            | 0.0282 $\pm$ 0.0202 | 0.00705 | 0.269 | 0.0846 | 0.138  | 0.212  | 0.274 | 0.345 | 0.440 | 0.719 |
|         | Province 1    | 6.98 $\pm$ 5.60     | 1.35    | 51.7  | 5.36   | 8.47   | 13.00  | 17.0  | 22.2  | 29.6  | 47.7  |
|         | Madhesh       | 10.4 $\pm$ 10.7     | 2.61    | 37.8  | 7.20   | 12.1   | 19.96  | 28.6  | 38.0  | 51.2  | 120   |
|         | Bagmati       | 4.85 $\pm$ 1.17     | 2.43    | 7.27  | 4.85   | 5.66   | 6.370  | 6.76  | 7.09  | 7.49  | 8.33  |
|         | Lumbini       | 5.77 $\pm$ 2.17     | 1.53    | 11.4  | 5.42   | 6.89   | 8.540  | 9.87  | 11.1  | 12.5  | 16.5  |
|         | Sudurpashchim | 4.75 $\pm$ 1.38     | 2.38    | 7.03  | 4.80   | 5.75   | 6.507  | 6.96  | 7.33  | 7.68  | 8.50  |
|         | Terai         | 6.88 $\pm$ 3.82     | 1.50    | 57.3  | 5.93   | 8.36   | 11.498 | 14.2  | 17.0  | 20.0  | 30.9  |
|         | Hill          | 5.55 $\pm$ 3.08     | 1.21    | 46.2  | 4.78   | 6.74   | 9.28   | 11.5  | 13.7  | 16.2  | 24.9  |
|         | Mountain      | 6.36 $\pm$ 3.53     | 1.39    | 52.9  | 5.48   | 7.73   | 10.633 | 13.1  | 15.7  | 18.5  | 28.5  |
|         | Urban         | 6.13 $\pm$ 3.41     | 1.34    | 51.0  | 5.28   | 7.45   | 10.251 | 12.7  | 15.2  | 17.9  | 27.5  |
|         | Rural         | 6.37 $\pm$ 3.54     | 1.39    | 53.0  | 5.49   | 7.74   | 10.644 | 13.2  | 15.7  | 18.5  | 28.6  |
|         | Women         | 7.79 $\pm$ 4.33     | 1.70    | 64.8  | 6.71   | 9.47   | 13.022 | 16.1  | 19.3  | 22.7  | 34.9  |
|         | Children      | 9.84 $\pm$ 5.47     | 2.15    | 81.9  | 8.48   | 12.0   | 16.450 | 20.3  | 24.3  | 28.7  | 44.1  |

|             |              |        |       |       |       |        |       |       |       |       |
|-------------|--------------|--------|-------|-------|-------|--------|-------|-------|-------|-------|
| Toddlers    | 12.0±6.69    | 2.63   | 100.2 | 10.37 | 14.6  | 20.129 | 24.9  | 29.8  | 35.1  | 54.0  |
| Preschooler | 17.7±9.85    | 3.87   | 147.5 | 15.27 | 21.5  | 29.625 | 36.6  | 43.8  | 51.6  | 79.5  |
| Total Nepal | 6.35±3.47    | 1.38   | 52.5  | 5.51  | 7.76  | 10.659 | 13.0  | 15.3  | 18.6  | 27.7  |
| HQ          | 0.159±0.0867 | 0.0344 | 1.31  | 0.138 | 0.194 | 0.266  | 0.324 | 0.382 | 0.466 | 0.692 |
| HI          | 1.13±0.368   | 0.240  | 2.49  | 1.09  | 1.35  | 1.62   | 1.79  | 1.94  | 2.17  | 2.52  |

**Table S5.** Carcinogenic risk (CR) and total carcinogenic risk (TCR) based on Monte Carlo simulation.

| Element | Categories    | Mean±Std                                     | P50                   | P75                   | P90                   | P95                   | P97.5                 | P99                   | P99.9                 |
|---------|---------------|----------------------------------------------|-----------------------|-----------------------|-----------------------|-----------------------|-----------------------|-----------------------|-----------------------|
| Cd      | Province 1    | 7.73×10 <sup>-4</sup> ±9.80×10 <sup>-4</sup> | 4.81×10 <sup>-4</sup> | 9.29×10 <sup>-4</sup> | 1.69×10 <sup>-3</sup> | 2.31×10 <sup>-3</sup> | 3.12×10 <sup>-3</sup> | 4.64×10 <sup>-3</sup> | 1.09×10 <sup>-2</sup> |
|         | Madhesh       | 7.76×10 <sup>-4</sup> ±6.89×10 <sup>-4</sup> | 5.67×10 <sup>-4</sup> | 9.13×10 <sup>-4</sup> | 1.47×10 <sup>-3</sup> | 1.99×10 <sup>-3</sup> | 2.60×10 <sup>-3</sup> | 3.45×10 <sup>-3</sup> | 6.55×10 <sup>-3</sup> |
|         | Bagmati       | 5.13×10 <sup>-4</sup> ±3.03×10 <sup>-4</sup> | 4.41×10 <sup>-4</sup> | 6.51×10 <sup>-4</sup> | 9.21×10 <sup>-4</sup> | 1.11×10 <sup>-3</sup> | 1.33×10 <sup>-3</sup> | 1.65×10 <sup>-3</sup> | 2.55×10 <sup>-3</sup> |
|         | Lumbini       | 7.58×10 <sup>-4</sup> ±5.06×10 <sup>-4</sup> | 6.53×10 <sup>-4</sup> | 1.03×10 <sup>-3</sup> | 1.47×10 <sup>-3</sup> | 1.75×10 <sup>-3</sup> | 2.01×10 <sup>-3</sup> | 2.26×10 <sup>-3</sup> | 2.79×10 <sup>-3</sup> |
|         | Sudurpashchim | 5.42×10 <sup>-4</sup> ±3.19×10 <sup>-4</sup> | 4.93×10 <sup>-4</sup> | 7.11×10 <sup>-4</sup> | 9.48×10 <sup>-4</sup> | 1.12×10 <sup>-3</sup> | 1.30×10 <sup>-3</sup> | 1.56×10 <sup>-3</sup> | 2.13×10 <sup>-3</sup> |
|         | Terai         | 7.24×10 <sup>-4</sup> ±5.92×10 <sup>-4</sup> | 5.64×10 <sup>-4</sup> | 9.27×10 <sup>-4</sup> | 1.43×10 <sup>-3</sup> | 1.83×10 <sup>-3</sup> | 2.26×10 <sup>-3</sup> | 2.98×10 <sup>-3</sup> | 4.71×10 <sup>-3</sup> |
|         | Hill          | 5.84×10 <sup>-4</sup> ±4.78×10 <sup>-4</sup> | 4.55×10 <sup>-4</sup> | 7.48×10 <sup>-4</sup> | 1.15×10 <sup>-3</sup> | 1.48×10 <sup>-3</sup> | 1.83×10 <sup>-3</sup> | 2.40×10 <sup>-3</sup> | 3.80×10 <sup>-3</sup> |
|         | Mountain      | 6.70×10 <sup>-4</sup> ±5.47×10 <sup>-4</sup> | 5.22×10 <sup>-4</sup> | 8.57×10 <sup>-4</sup> | 1.32×10 <sup>-3</sup> | 1.70×10 <sup>-3</sup> | 2.09×10 <sup>-3</sup> | 2.75×10 <sup>-3</sup> | 4.36×10 <sup>-3</sup> |
|         | Urban         | 6.46×10 <sup>-4</sup> ±5.28×10 <sup>-4</sup> | 5.03×10 <sup>-4</sup> | 8.26×10 <sup>-4</sup> | 1.28×10 <sup>-3</sup> | 1.64×10 <sup>-3</sup> | 2.02×10 <sup>-3</sup> | 2.65×10 <sup>-3</sup> | 4.20×10 <sup>-3</sup> |
|         | Rural         | 6.70×10 <sup>-4</sup> ±5.48×10 <sup>-4</sup> | 5.22×10 <sup>-4</sup> | 8.58×10 <sup>-4</sup> | 1.32×10 <sup>-3</sup> | 1.70×10 <sup>-3</sup> | 2.09×10 <sup>-3</sup> | 2.76×10 <sup>-3</sup> | 4.36×10 <sup>-3</sup> |
|         | Women         | 8.20×10 <sup>-4</sup> ±6.70×10 <sup>-4</sup> | 6.39×10 <sup>-4</sup> | 1.05×10 <sup>-3</sup> | 1.62×10 <sup>-3</sup> | 2.08×10 <sup>-3</sup> | 2.56×10 <sup>-3</sup> | 3.37×10 <sup>-3</sup> | 5.34×10 <sup>-3</sup> |
|         | Children      | 1.04×10 <sup>-3</sup> ±8.47×10 <sup>-4</sup> | 8.07×10 <sup>-4</sup> | 1.33×10 <sup>-3</sup> | 2.05×10 <sup>-3</sup> | 2.63×10 <sup>-3</sup> | 3.24×10 <sup>-3</sup> | 4.26×10 <sup>-3</sup> | 6.74×10 <sup>-3</sup> |
|         | Toddlers      | 1.27×10 <sup>-3</sup> ±1.04×10 <sup>-4</sup> | 9.87×10 <sup>-4</sup> | 1.62×10 <sup>-3</sup> | 2.50×10 <sup>-3</sup> | 3.21×10 <sup>-3</sup> | 3.96×10 <sup>-3</sup> | 5.21E-03              | 8.25×10 <sup>-3</sup> |
|         | Preschooler   | 1.87×10 <sup>-3</sup> ±1.53×10 <sup>-3</sup> | 1.45×10 <sup>-3</sup> | 2.39×10 <sup>-3</sup> | 3.69×10 <sup>-3</sup> | 4.73×10 <sup>-3</sup> | 5.83×10 <sup>-3</sup> | 7.67×10 <sup>-3</sup> | 1.21×10 <sup>-2</sup> |
|         | Total Nepal   | 6.62×10 <sup>-4</sup> ±5.42×10 <sup>-4</sup> | 5.16×10 <sup>-4</sup> | 8.39×10 <sup>-4</sup> | 1.29×10 <sup>-3</sup> | 1.67×10 <sup>-3</sup> | 2.10×10 <sup>-3</sup> | 2.68×10 <sup>-3</sup> | 4.39×10 <sup>-3</sup> |
| As      | Province 1    | 3.17×10 <sup>-4</sup> ±1.42×10 <sup>-4</sup> | 3.16×10 <sup>-4</sup> | 4.03×10 <sup>-4</sup> | 4.87×10 <sup>-4</sup> | 5.46×10 <sup>-4</sup> | 6.03×10 <sup>-4</sup> | 6.80×10 <sup>-4</sup> | 9.00×10 <sup>-4</sup> |
|         | Madhesh       | 4.70×10 <sup>-4</sup> ±2.54×10 <sup>-4</sup> | 4.12×10 <sup>-4</sup> | 5.87×10 <sup>-4</sup> | 7.94×10 <sup>-4</sup> | 9.47×10 <sup>-4</sup> | 1.12×10 <sup>-3</sup> | 1.34×10 <sup>-3</sup> | 1.91×10 <sup>-3</sup> |
|         | Bagmati       | 3.41×10 <sup>-4</sup> ±1.00×10 <sup>-4</sup> | 3.34×10 <sup>-4</sup> | 4.15×10 <sup>-4</sup> | 4.82×10 <sup>-4</sup> | 5.18×10 <sup>-4</sup> | 5.43×10 <sup>-4</sup> | 5.66×10 <sup>-4</sup> | 5.92×10 <sup>-4</sup> |
|         | Lumbini       | 4.43×10 <sup>-4</sup> ±1.51×10 <sup>-4</sup> | 4.37×10 <sup>-4</sup> | 5.60×10 <sup>-4</sup> | 6.52×10 <sup>-4</sup> | 6.96×10 <sup>-4</sup> | 7.24×10 <sup>-4</sup> | 7.47×10 <sup>-4</sup> | 7.70×10 <sup>-4</sup> |
|         | Sudurpashchim | 2.45×10 <sup>-4</sup> ±8.74×10 <sup>-5</sup> | 2.44×10 <sup>-4</sup> | 3.18×10 <sup>-4</sup> | 3.67×10 <sup>-4</sup> | 3.84×10 <sup>-4</sup> | 3.94×10 <sup>-4</sup> | 4.00×10 <sup>-4</sup> | 4.05×10 <sup>-4</sup> |
|         | Terai         | 4.11×10 <sup>-4</sup> ±1.68×10 <sup>-4</sup> | 3.96×10 <sup>-4</sup> | 5.11×10 <sup>-4</sup> | 6.27×10 <sup>-4</sup> | 7.13×10 <sup>-4</sup> | 7.98×10 <sup>-4</sup> | 8.80×10 <sup>-4</sup> | 1.09×10 <sup>-3</sup> |
|         | Hill          | 3.31×10 <sup>-4</sup> ±1.36×10 <sup>-4</sup> | 3.20×10 <sup>-4</sup> | 4.13×10 <sup>-4</sup> | 5.06×10 <sup>-4</sup> | 5.76×10 <sup>-4</sup> | 6.44×10 <sup>-4</sup> | 7.10×10 <sup>-4</sup> | 8.84×10 <sup>-4</sup> |
|         | Mountain      | 3.80×10 <sup>-4</sup> ±1.56×10 <sup>-4</sup> | 3.66×10 <sup>-4</sup> | 4.73×10 <sup>-4</sup> | 5.80×10 <sup>-4</sup> | 6.60×10 <sup>-4</sup> | 7.38×10 <sup>-4</sup> | 8.14×10 <sup>-4</sup> | 1.01×10 <sup>-3</sup> |
|         | Urban         | 3.66×10 <sup>-4</sup> ±1.50×10 <sup>-4</sup> | 3.53×10 <sup>-4</sup> | 4.56×10 <sup>-4</sup> | 5.59×10 <sup>-4</sup> | 6.36×10 <sup>-4</sup> | 7.11×10 <sup>-4</sup> | 7.85×10 <sup>-4</sup> | 9.76×10 <sup>-4</sup> |
|         | Rural         | 3.80×10 <sup>-4</sup> ±1.56×10 <sup>-4</sup> | 3.67×10 <sup>-4</sup> | 4.73×10 <sup>-4</sup> | 5.81×10 <sup>-4</sup> | 6.61×10 <sup>-4</sup> | 7.39×10 <sup>-4</sup> | 8.15×10 <sup>-4</sup> | 1.01×10 <sup>-3</sup> |
|         | Women         | 4.65×10 <sup>-4</sup> ±1.91×10 <sup>-4</sup> | 4.48×10 <sup>-4</sup> | 5.79×10 <sup>-4</sup> | 7.11×10 <sup>-4</sup> | 8.08×10 <sup>-4</sup> | 9.04×10 <sup>-4</sup> | 9.97×10 <sup>-4</sup> | 1.24×10 <sup>-3</sup> |
|         | Children      | 5.87×10 <sup>-4</sup> ±2.41×10 <sup>-4</sup> | 5.66×10 <sup>-4</sup> | 7.32×10 <sup>-4</sup> | 8.98×10 <sup>-4</sup> | 1.02×10 <sup>-3</sup> | 1.14×10 <sup>-3</sup> | 1.26×10 <sup>-3</sup> | 1.57×10 <sup>-3</sup> |
|         | Toddlers      | 7.19×10 <sup>-4</sup> ±2.94×10 <sup>-4</sup> | 6.93×10 <sup>-4</sup> | 8.95×10 <sup>-4</sup> | 1.10×10 <sup>-3</sup> | 1.25×10 <sup>-3</sup> | 1.40×10 <sup>-3</sup> | 1.54×10 <sup>-3</sup> | 1.92×10 <sup>-3</sup> |
|         | Preschooler   | 1.06×10 <sup>-3</sup> ±4.33×10 <sup>-4</sup> | 1.02×10 <sup>-3</sup> | 1.32×10 <sup>-3</sup> | 1.62×10 <sup>-3</sup> | 1.84×10 <sup>-3</sup> | 2.06×10 <sup>-3</sup> | 2.27×10 <sup>-3</sup> | 2.82×10 <sup>-3</sup> |
|         | Total Nepal   | 3.75×10 <sup>-4</sup> ±1.55×10 <sup>-4</sup> | 3.58×10 <sup>-4</sup> | 4.70×10 <sup>-4</sup> | 5.82×10 <sup>-4</sup> | 6.53×10 <sup>-4</sup> | 7.27×10 <sup>-4</sup> | 8.14×10 <sup>-4</sup> | 1.01×10 <sup>-3</sup> |
| Pb      | Province 1    | 8.30×10 <sup>-7</sup> ±6.04×10 <sup>-7</sup> | 6.55×10 <sup>-7</sup> | 1.00×10 <sup>-6</sup> | 1.53×10 <sup>-6</sup> | 1.95×10 <sup>-6</sup> | 2.47×10 <sup>-6</sup> | 3.10×10 <sup>-6</sup> | 5.36×10 <sup>-6</sup> |
|         | Madhesh       | 9.92×10 <sup>-7</sup> ±5.89×10 <sup>-7</sup> | 8.49×10 <sup>-7</sup> | 1.23×10 <sup>-6</sup> | 1.74×10 <sup>-6</sup> | 2.11×10 <sup>-6</sup> | 2.51×10 <sup>-6</sup> | 2.99×10 <sup>-6</sup> | 4.54×10 <sup>-6</sup> |
|         | Bagmati       | 6.22×10 <sup>-7</sup> ±4.07×10 <sup>-7</sup> | 5.11×10 <sup>-7</sup> | 7.31×10 <sup>-7</sup> | 1.05×10 <sup>-6</sup> | 1.34×10 <sup>-6</sup> | 1.68×10 <sup>-6</sup> | 2.11×10 <sup>-6</sup> | 3.83×10 <sup>-6</sup> |
|         | Lumbini       | 9.86×10 <sup>-7</sup> ±4.68×10 <sup>-7</sup> | 8.88×10 <sup>-7</sup> | 1.20×10 <sup>-6</sup> | 1.59×10 <sup>-6</sup> | 1.88×10 <sup>-6</sup> | 2.15×10 <sup>-6</sup> | 2.53×10 <sup>-6</sup> | 3.43×10 <sup>-6</sup> |
|         | Sudurpashchim | 5.78×10 <sup>-7</sup> ±7.87×10 <sup>-7</sup> | 4.05×10 <sup>-7</sup> | 5.75×10 <sup>-7</sup> | 9.23×10 <sup>-7</sup> | 1.33×10 <sup>-6</sup> | 1.92×10 <sup>-6</sup> | 2.86×10 <sup>-6</sup> | 8.75×10 <sup>-6</sup> |
|         | Terai         | 9.22×10 <sup>-7</sup> ±6.54×10 <sup>-7</sup> | 7.37×10 <sup>-7</sup> | 1.11×10 <sup>-6</sup> | 1.64×10 <sup>-6</sup> | 2.10×10 <sup>-6</sup> | 2.60×10 <sup>-6</sup> | 3.46×10 <sup>-6</sup> | 6.42×10 <sup>-6</sup> |
|         | Hill          | 7.44×10 <sup>-7</sup> ±5.28×10 <sup>-7</sup> | 5.95×10 <sup>-7</sup> | 8.94×10 <sup>-7</sup> | 1.33×10 <sup>-6</sup> | 1.70×10 <sup>-6</sup> | 2.10×10 <sup>-6</sup> | 2.79×10 <sup>-6</sup> | 5.18×10 <sup>-6</sup> |
|         | Mountain      | 8.53×10 <sup>-7</sup> ±6.05×10 <sup>-7</sup> | 6.82×10 <sup>-7</sup> | 1.02×10 <sup>-6</sup> | 1.52×10 <sup>-6</sup> | 1.94×10 <sup>-6</sup> | 2.41×10 <sup>-6</sup> | 3.20×10 <sup>-6</sup> | 5.94×10 <sup>-6</sup> |
|         | Urban         | 8.22×10 <sup>-7</sup> ±5.83×10 <sup>-7</sup> | 6.57×10 <sup>-7</sup> | 9.88×10 <sup>-7</sup> | 1.47×10 <sup>-6</sup> | 1.87×10 <sup>-6</sup> | 2.32×10 <sup>-6</sup> | 3.09×10 <sup>-6</sup> | 5.72×10 <sup>-6</sup> |
|         | Rural         | 8.54×10 <sup>-7</sup> ±6.05×10 <sup>-7</sup> | 6.82×10 <sup>-7</sup> | 1.03×10 <sup>-6</sup> | 1.52×10 <sup>-6</sup> | 1.95×10 <sup>-6</sup> | 2.41×10 <sup>-6</sup> | 3.20×10 <sup>-6</sup> | 5.94×10 <sup>-6</sup> |
|         | Women         | 1.04×10 <sup>-6</sup> ±7.41×10 <sup>-7</sup> | 8.35×10 <sup>-7</sup> | 1.26×10 <sup>-6</sup> | 1.86×10 <sup>-6</sup> | 2.38×10 <sup>-6</sup> | 2.95×10 <sup>-6</sup> | 3.92×10 <sup>-6</sup> | 7.27×10 <sup>-6</sup> |
|         | Children      | 1.32×10 <sup>-6</sup> ±9.36×10 <sup>-7</sup> | 1.05×10 <sup>-6</sup> | 1.59×10 <sup>-6</sup> | 2.35×10 <sup>-6</sup> | 3.01×10 <sup>-6</sup> | 3.73×10 <sup>-6</sup> | 4.95×10 <sup>-6</sup> | 9.19×10 <sup>-6</sup> |
|         | Toddlers      | 1.61×10 <sup>-6</sup> ±1.14×10 <sup>-6</sup> | 1.29×10 <sup>-6</sup> | 1.94×10 <sup>-6</sup> | 2.88×10 <sup>-6</sup> | 3.68×10 <sup>-6</sup> | 4.56×10 <sup>-6</sup> | 6.06×10 <sup>-6</sup> | 1.12×10 <sup>-5</sup> |
|         | Preschooler   | 2.38×10 <sup>-6</sup> ±1.69×10 <sup>-6</sup> | 1.90×10 <sup>-6</sup> | 2.86×10 <sup>-6</sup> | 4.23×10 <sup>-6</sup> | 5.42×10 <sup>-6</sup> | 6.71×10 <sup>-6</sup> | 8.92×10 <sup>-6</sup> | 1.65×10 <sup>-5</sup> |
|         | Total Nepal   | 8.54×10 <sup>-7</sup> ±6.12×10 <sup>-7</sup> | 6.79×10 <sup>-7</sup> | 1.02×10 <sup>-6</sup> | 1.52×10 <sup>-6</sup> | 1.96×10 <sup>-6</sup> | 2.48×10 <sup>-6</sup> | 3.25×10 <sup>-6</sup> | 5.57×10 <sup>-6</sup> |
|         | TCR           | 1.04×10 <sup>-3</sup> ±5.63×10 <sup>-4</sup> | 9.06×10 <sup>-4</sup> | 1.25×10 <sup>-3</sup> | 1.70×10 <sup>-3</sup> | 2.09×10 <sup>-3</sup> | 2.49×10 <sup>-3</sup> | 3.08×10 <sup>-3</sup> | 4.79×10 <sup>-3</sup> |

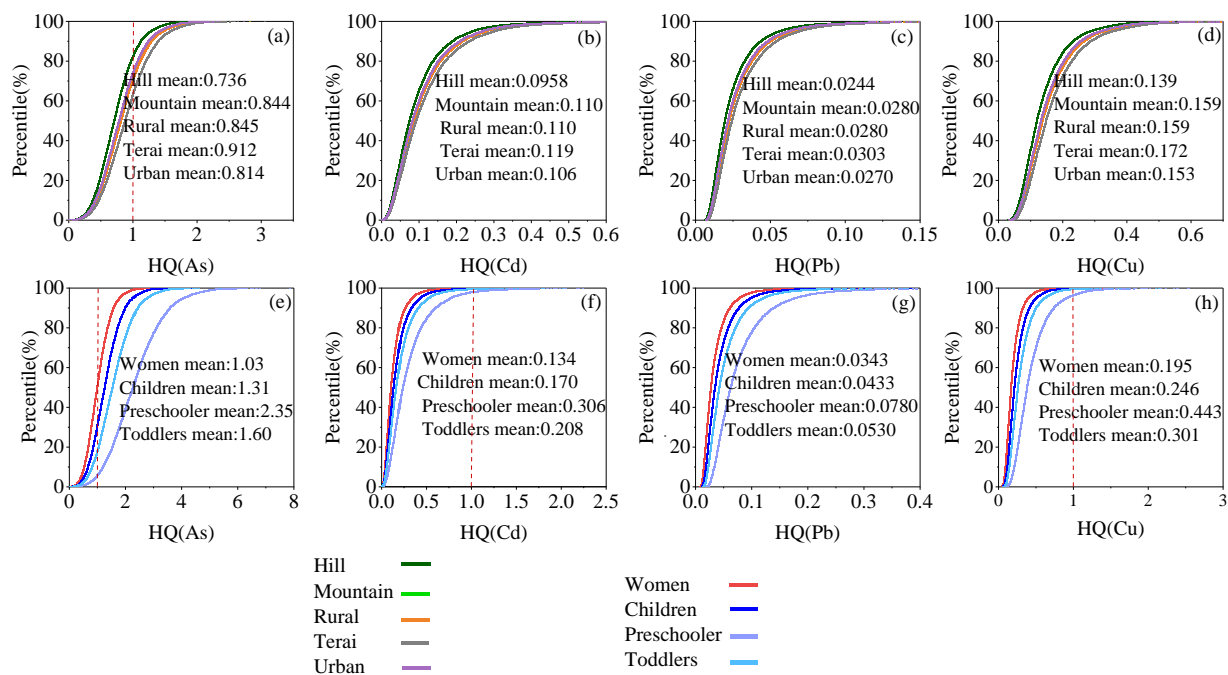

**Figure S1.** Probability distribution of hazard quotients (HQs) of As (a), Cd (b), Pb (c), and Cu (d) in different regions, and probability distribution of hazard quotients (HQs) of As (e), Cd (f), Pb (g), and Cu (h) for various vulnerable populations.

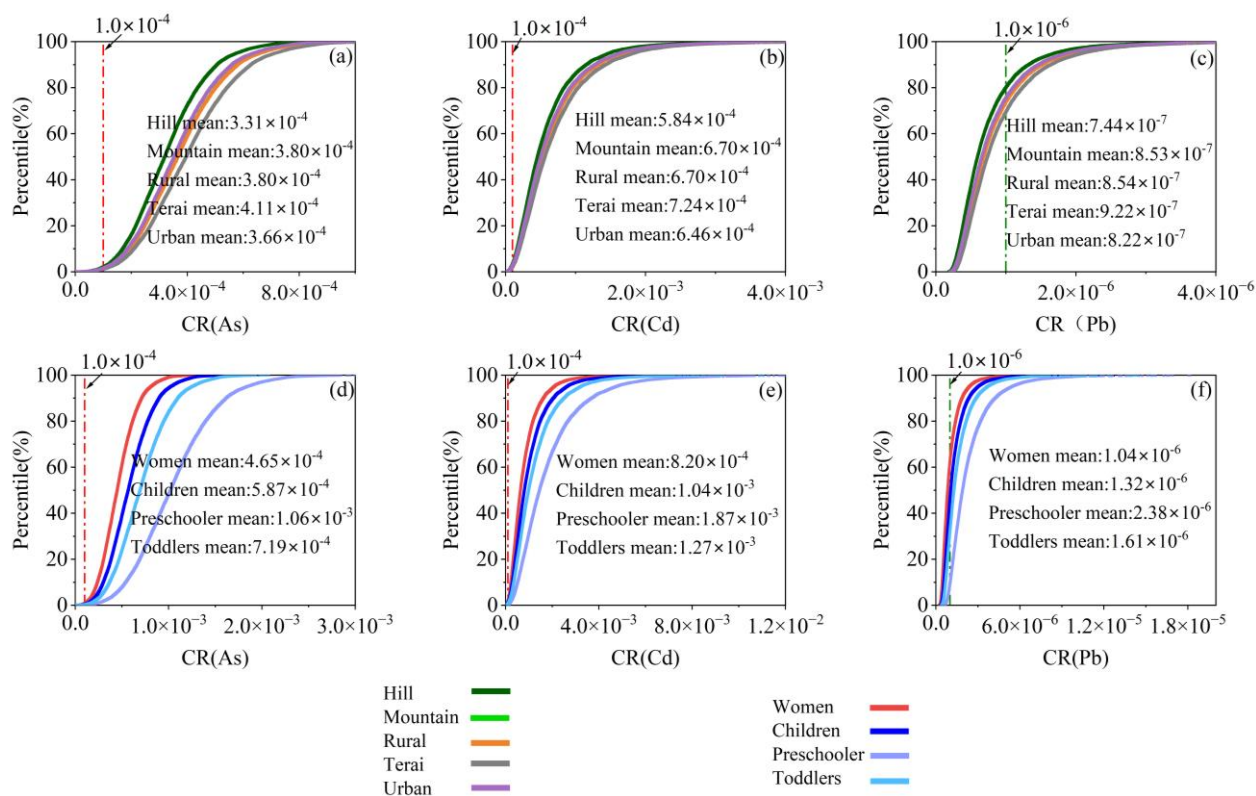

**Figure S2.** Probability distributions for Carcinogenic risk (CR) of As (a), Cd (b), and Pb (c) in different regions, and probability distributions for Carcinogenic risk (CR) of As (d), Cd (e), and Pb (f) for various vulnerable populations.

## References

1. Qian, Y.; Chen, C.; Zhang, Q.; Li, Y.; Chen, Z.; Li, M. Concentrations of cadmium, lead, mercury and arsenic in Chinese market milled rice and associated population health risk. *Food Control* **2010**, *21* (12), 1757-1763.
2. Saville, N. M.; Maharjan, M.; Manandhar, D. S.; Harris-Fry, H. A. Equity implications of rice fortification: a modelling study from Nepal. *Public Health Nutr.* **2020**, *23* (15), 2824-2839.
3. Panter-Brick; Catherine. Women's work and child nutrition: The food intake of 0-4 year old children in rural Nepal. *Ecol. Food Nutr.* **1992**, *29* (1), 207-230.
4. MEP. Exposure Factors Handbook of Chinese Population (Adults). Beijing: Ministry of 175 Environmental Protection, Chinese. 2013.

5. Meharg, A. A.; Norton, G.; Deacon, C.; Williams, P.; Adomako, E. E.; Price, A.; Zhu, Y.; Li, G.; Zhao, F. J.; McGrath, S.; Villada, A.; Sommella, A.; De Silva, P. M.; Brammer, H.; Dasgupta, T.; Islam, M. R. Variation in rice cadmium related to human exposure. *Environ. Sci. Technol.* **2013**, *47* (11), 5613-8.
6. Norton, G. J.; Williams, P. N.; Adomako, E. E.; Price, A. H.; Zhu, Y.; Zhao, F. J.; McGrath, S.; Deacon, C. M.; Villada, A.; Sommella, A.; Lu, Y.; Ming, L.; De Silva, P.; Brammer, H.; Dasgupta, T.; Islam, M. R.; Meharg, A. A. Lead in rice: analysis of baseline lead levels in market and field collected rice grains. *Sci. Total Environ.* **2014**, *485-486*, 428-434.
7. Liu, L.; Han, J.; Xu, X.; Xu, Z.; Abeysinghe, K. S.; Atapattu, A. J.; De Silva, P.; Lu, Q.; Qiu, G. Dietary exposure assessment of cadmium, arsenic, and lead in market rice from Sri Lanka. *Environ. Sci. Pollut. Res.* **2020**, *27* (34), 42704-42712.
8. Diyabalanage, S.; Fonseka, S.; Dasanayake, D.; Chandrajith, R. Environmental exposures of trace elements assessed using keratinized matrices from patients with chronic kidney diseases of uncertain etiology (CKDu) in Sri Lanka. *J. Trace Elem. Med Biol.* **2017**, *39*, 62-70.
9. Praveena, S. M.; Omar, N. A. Heavy metal exposure from cooked rice grain ingestion and its potential health risks to humans from total and bioavailable forms analysis. *Food Chem.* **2017**, *235*, 203-211.
10. Mirlohi, M.; Morekian, R.; Azadbakht, L.; Maracy, M. Heavy metal distribution frequency in Iranian and imported rice varieties marketed in central Iran, Yazd, 2012. *Int. J. Environ. Health Eng.* **2013**, *2* (1).
11. Batista, B. L.; Nacano, L. R.; Freitas, R. d.; Oliveira-Souza, V. C. d.; Barbosa, F. Determination of Essential (Ca, Fe, I, K, Mo) and Toxic Elements (Hg, Pb) in Brazilian Rice Grains and Estimation of Reference Daily Intake. *Food Nutr. Sci.* **2012**, *03* (01), 129-134.
12. Fang, Y.; Sun, X.; Yang, W.; Ma, N.; Xin, Z.; Fu, J.; Liu, X.; Liu, M.; Mariga, A. M.; Zhu, X.; Hu, Q. Concentrations and health risks of lead, cadmium, arsenic, and mercury in rice and edible mushrooms in China. *Food Chem.* **2014**, *147*, 147-51.
13. Jung, M. C.; Yun, S. T.; Lee, J. S.; Lee, J. U. Baseline study on essential and trace elements in polished rice from South Korea. *Environ Geochem Health* **2005**, *27* (5-6), 455-64.
14. Rahman, M. A.; Rahman, M. M.; Reichman, S. M.; Lim, R. P.; Naidu, R. Heavy metals in Australian grown and imported rice and vegetables on sale in Australia: health hazard. *Ecotoxicol. Environ. Saf.* **2014**, *100*, 53-60.
15. Djahed, B.; Taghavi, M.; Farzadkia, M.; Norzaee, S.; Miri, M. Stochastic exposure and health risk assessment of rice contamination to the heavy metals in the market of Iranshahr, Iran. *Food Chem. Toxicol.* **2018**, *115*, 405-412.
